# Supplementary material for: Spectroscopic dimensions of silver nanoparticles and clusters in ZnO matrix and their role in bioinspired antifouling and photocatalysis
Source: Royal Society of Chemistry journal article supplement (doi:10.1039/c4cp00169a), 2014-01-01
Supplement: c4cp00169a1.pdf [file c4cp00169a1.pdf]

**Electronic Supplementary Information**

**Spectroscopic dimensions of silver nanoparticles and clusters in  
ZnO matrix and their role in bioinspired antifouling and  
photocatalysis**

Robin Jude Vimal Michael<sup>a</sup>, Balaji Sambandam<sup>b</sup>, Thangavelu Muthukumar<sup>c</sup>, Manickam J. Umapathy<sup>a</sup> and Periakaruppan T. Manoharan<sup>b\*</sup>

<sup>a</sup> *Department of Chemistry, Anna university, Chennai 600 025, India*

<sup>b</sup> *Department of Chemistry, Indian Institute of Technology-Madras, Chennai 600 036, India*

<sup>c</sup> *Department of Biotechnology, Indian Institute of Technology-Madras, Chennai 600 036, India*

*\*corresponding author*

*E-mail: [ptm@iitm.ac.in](mailto:ptm@iitm.ac.in)*

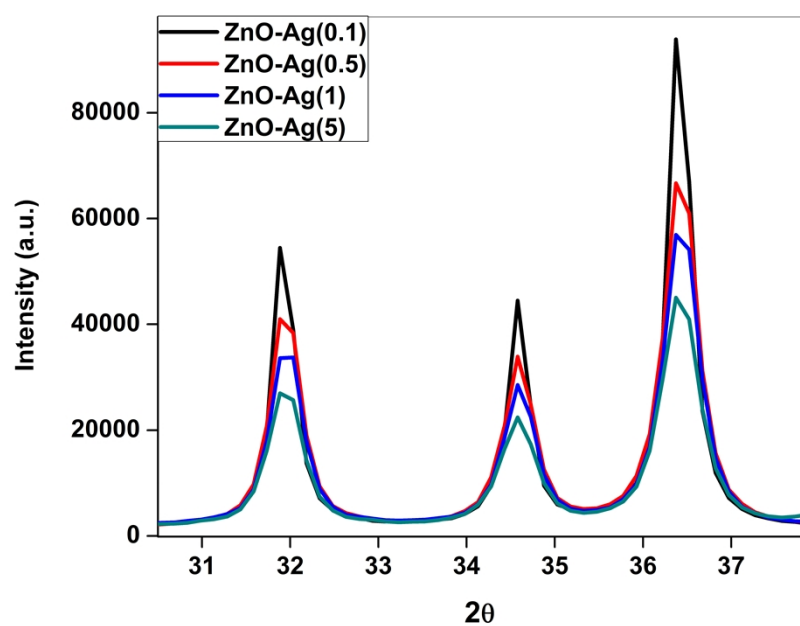

**Fig. S1** X-Ray diffraction patterns of Silver (0.1, 0.5, 1 and 5%) loaded ZnO with expanded region of  $2\theta$  from  $30^\circ$  -  $38^\circ$  in  $\text{Zn}_{1-\delta}\text{Ag}_\delta\text{O}$ .

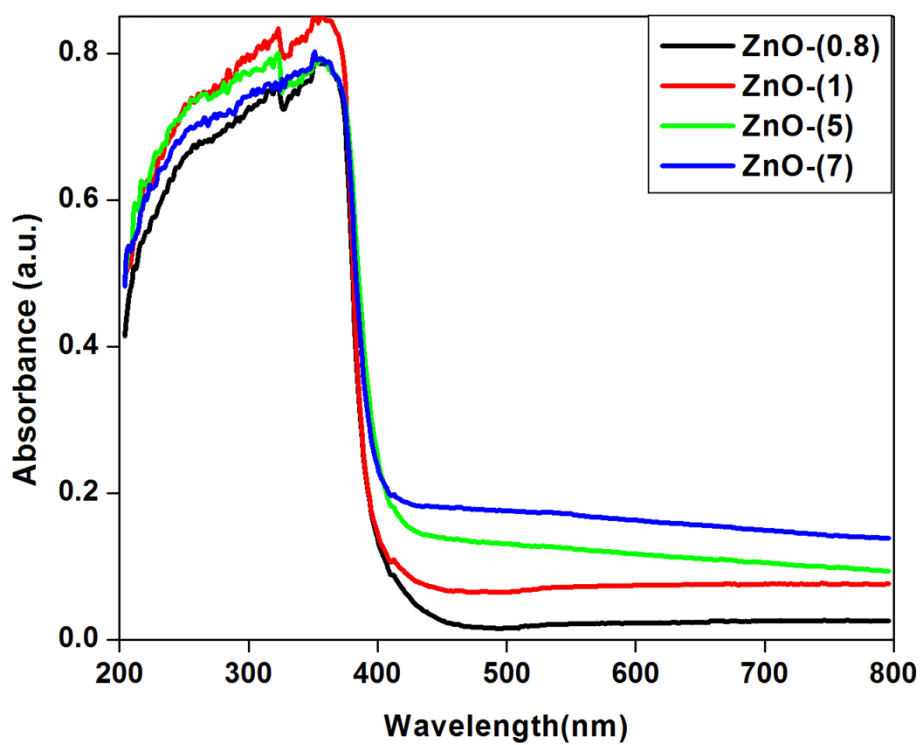

**Fig. S2** DRS UV-Visible spectra of ZnO-(with different ZnO/Fuel ratios).

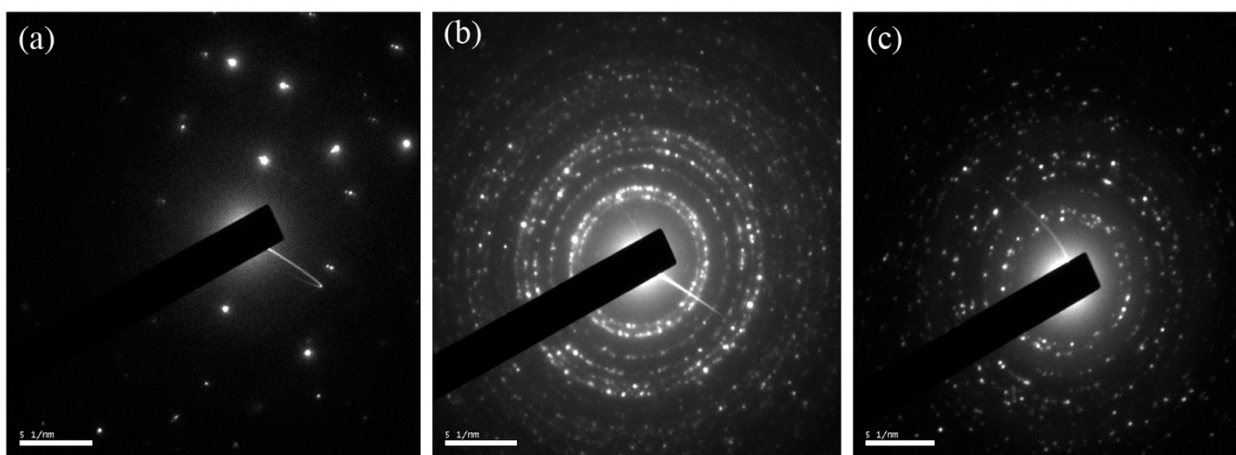

**Fig. S3** Electron diffraction pattern of (a) pure ZnO (b) ZnO-Ag(0.5) and (c) ZnO-Ag(5) with corresponding HR-TEM images given in Fig. 8.

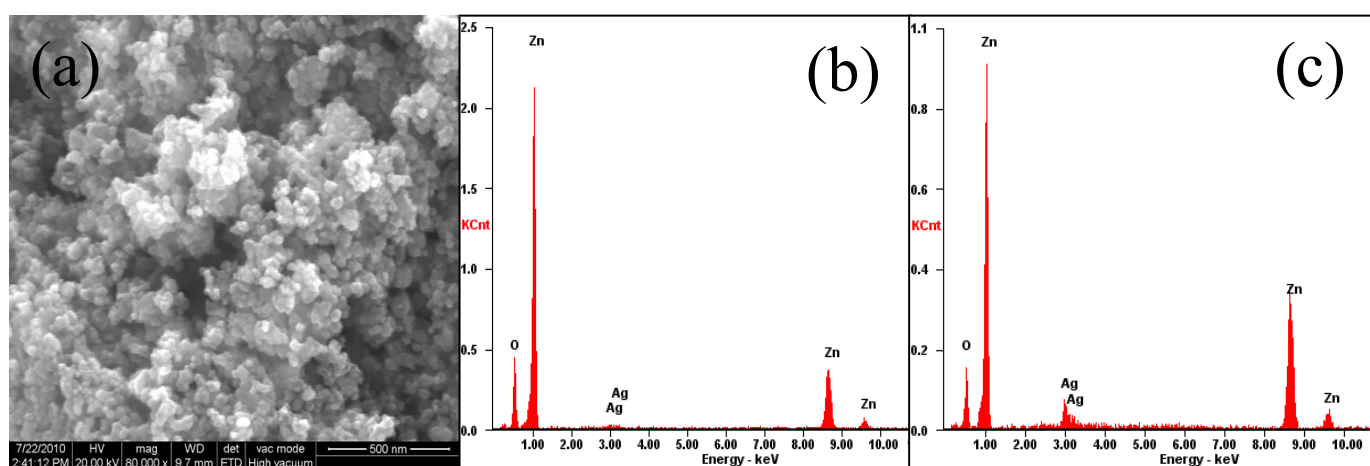

**Fig. S4** SEM image of (a) ZnO-Ag(5) and EDAX of (b) ZnO-Ag(1) and (c) ZnO-Ag(5).

### Photocatalytic activity on degradation of Rh-B with different ZnO/Fuel ratios

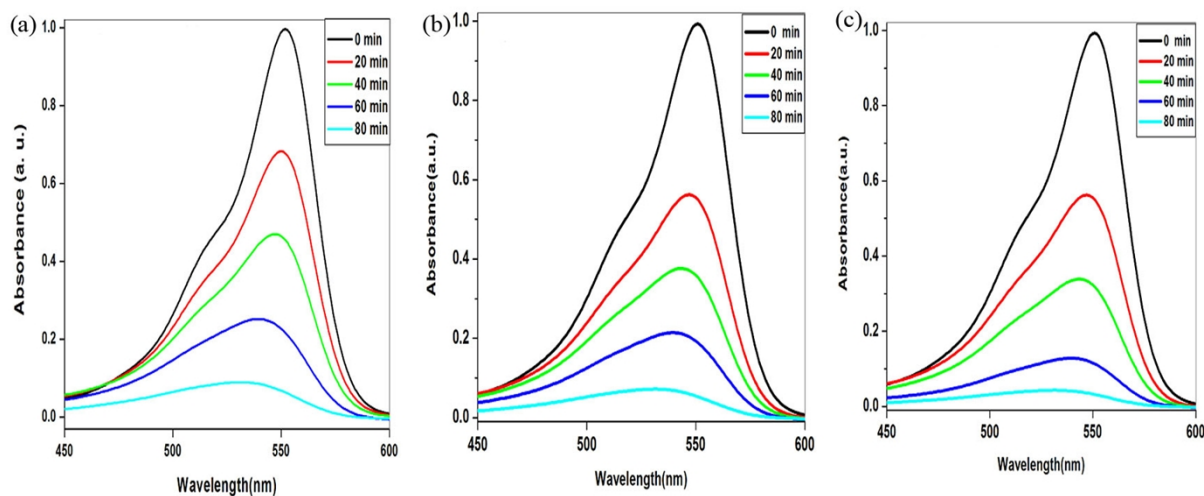

**Fig. S5** (a), (b) and (c) Photocatalytic activity on degradation of Rh-B with different ZnO/Fuel Ratio of 0.8, 1 and 3 respectively

### Photocatalytic activity on degradation of Rh-B with silver doped ZnO

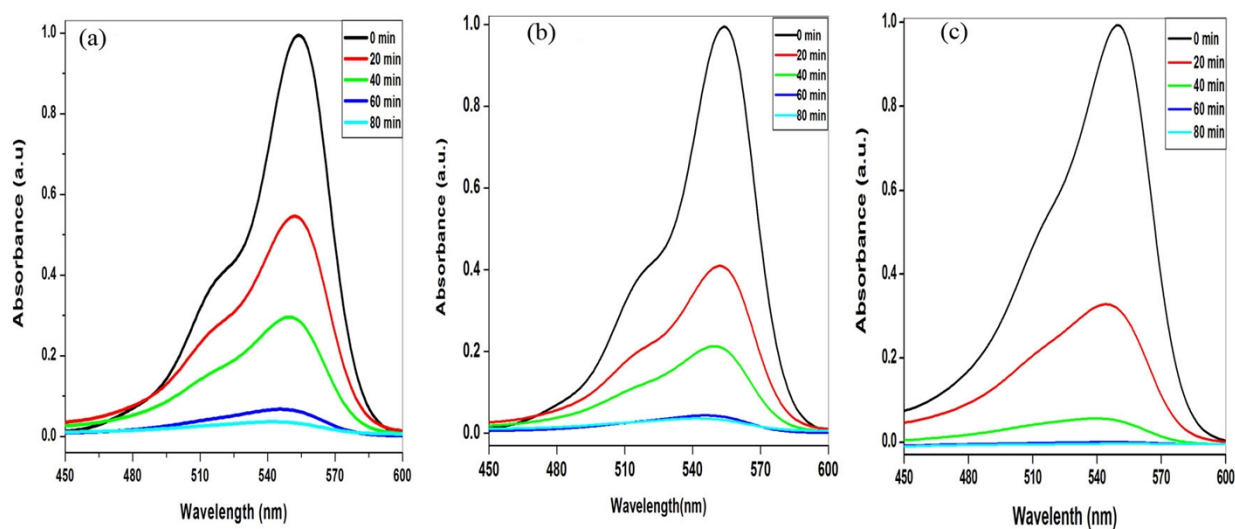

**Fig. S6** (a), (b) and (c) Photocatalytic activity on degradation of Rh-B with silver doped ZnO of 0.1 %, 0.5% and 1% respectively. In these experiments ZnO/Fuel ratio was kept at 3.0

## Photocatalytic activity on degradation of 4-Chlorophenol with ZnO and silver doped ZnO

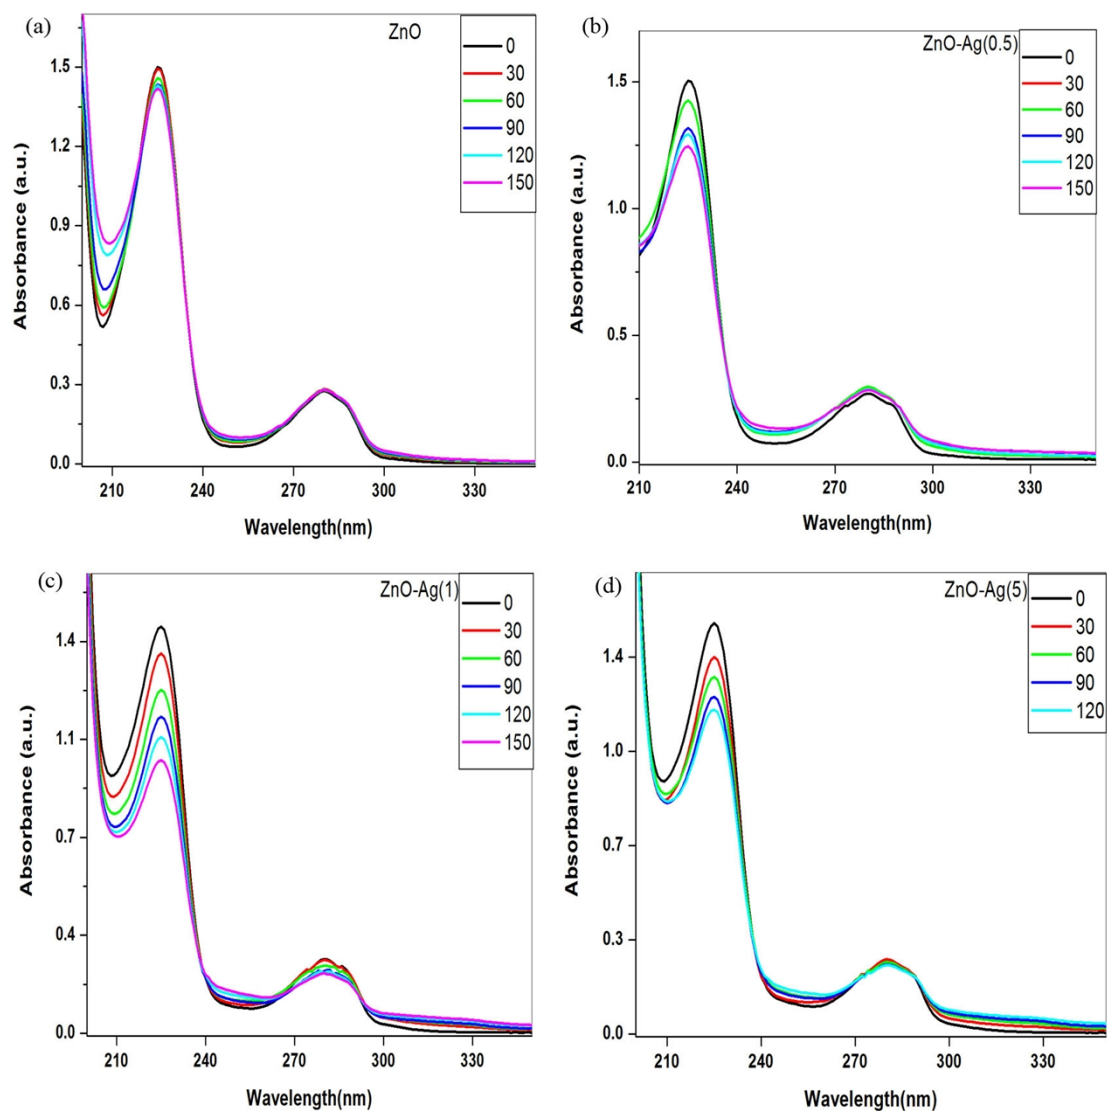

**Fig. S7** (a), (b), (c) and (d) Photocatalytic activity on degradation of 4-Chlorophenol with silver doped ZnO of 0.5%, 1% and 5% respectively. In these experiments also ZnO/Fuel ratio was kept at 3.0.
